# Supplementary material for: IRF2BP2 Mutation Is Associated with Increased STAT1 and STAT5 Activation in Two Family Members with Inflammatory Conditions and Lymphopenia
Source: MDPI journal article supplement (doi:10.3390/ph14080797), 2021-08-13
Supplement: s1 [file s1]

## Supplementary material

Palmroth et al: IRF2BP2 mutation is associated with increased STAT1 and STAT5 activation in two family members with inflammatory conditions and lymphopenia

**Supplementary Table S1:** Clinical parameters of index patient and sister. Values differing from reference values are marked in bold.

|                                                | Index patient: Male                                                                                     |                      | Sister: Female                                                                                          |                        |
|------------------------------------------------|---------------------------------------------------------------------------------------------------------|----------------------|---------------------------------------------------------------------------------------------------------|------------------------|
| Clinical findings and symptoms                 | Oral and genital ulcers, Hidradenitis suppurativa, Acne, Periodic abdominal pain and fever, Weight loss |                      | Hidradenitis suppurativa, Diabetes mellitus type 2, Hypertension, Hyperthyreosis, Dystrofia myotonica 2 |                        |
| Age at sampling (years)                        | 57                                                                                                      |                      | 71                                                                                                      |                        |
|                                                |                                                                                                         | Normal range (males) |                                                                                                         | Normal range (females) |
| Leukocytes (cells/ul)                          | <b>2000</b>                                                                                             | 3400-8200            | 5000                                                                                                    | 3400-8200              |
| Lymphocytes (cells/ul)                         | <b>650</b>                                                                                              | 1200-3500            | <b>470</b>                                                                                              | 1200-3500              |
| Neutrophils (cells/ul)                         | <b>1290</b>                                                                                             | 1600-6200            | 4080                                                                                                    | 1600-6200              |
| Platelets (cells/l)                            | 154                                                                                                     | 150 -360             | 272                                                                                                     | 150 -360               |
| Hemoglobin (g/l)                               | <b>122</b>                                                                                              | 134-167              | 140                                                                                                     | 117-155                |
| CD4 (cells/ul)                                 | <b>230</b>                                                                                              | 520-1470             | ND                                                                                                      |                        |
| CD8 (cells/ul)                                 | <b>190</b>                                                                                              | 210-920              | ND                                                                                                      |                        |
| CD19 (cells/ul)                                | <b>40</b>                                                                                               | 90-510               | ND                                                                                                      |                        |
| CD16/56 (cells/ul)                             | 120                                                                                                     | 70-560               | ND                                                                                                      |                        |
| IgG g/l                                        | 12,6                                                                                                    | 6,8-15,0             | <b>4,5</b>                                                                                              | 6,8-15,0               |
| IgA g/l                                        | 3,28                                                                                                    | 0,88-4,84            | ND                                                                                                      |                        |
| IgM g/l                                        | 0,79                                                                                                    | 0,36-2,59            | 0,59                                                                                                    | 0,47-2,84              |
| IgE kU/l                                       | 12                                                                                                      | 0-100                | ND                                                                                                      |                        |
| Complement activation                          | normal                                                                                                  |                      | ND                                                                                                      |                        |
| Polysaccharide vaccine response (pneumococcal) | normal                                                                                                  |                      | ND                                                                                                      |                        |

CD; cluster of differentiation, Ig; immunoglobulin, ND; no data

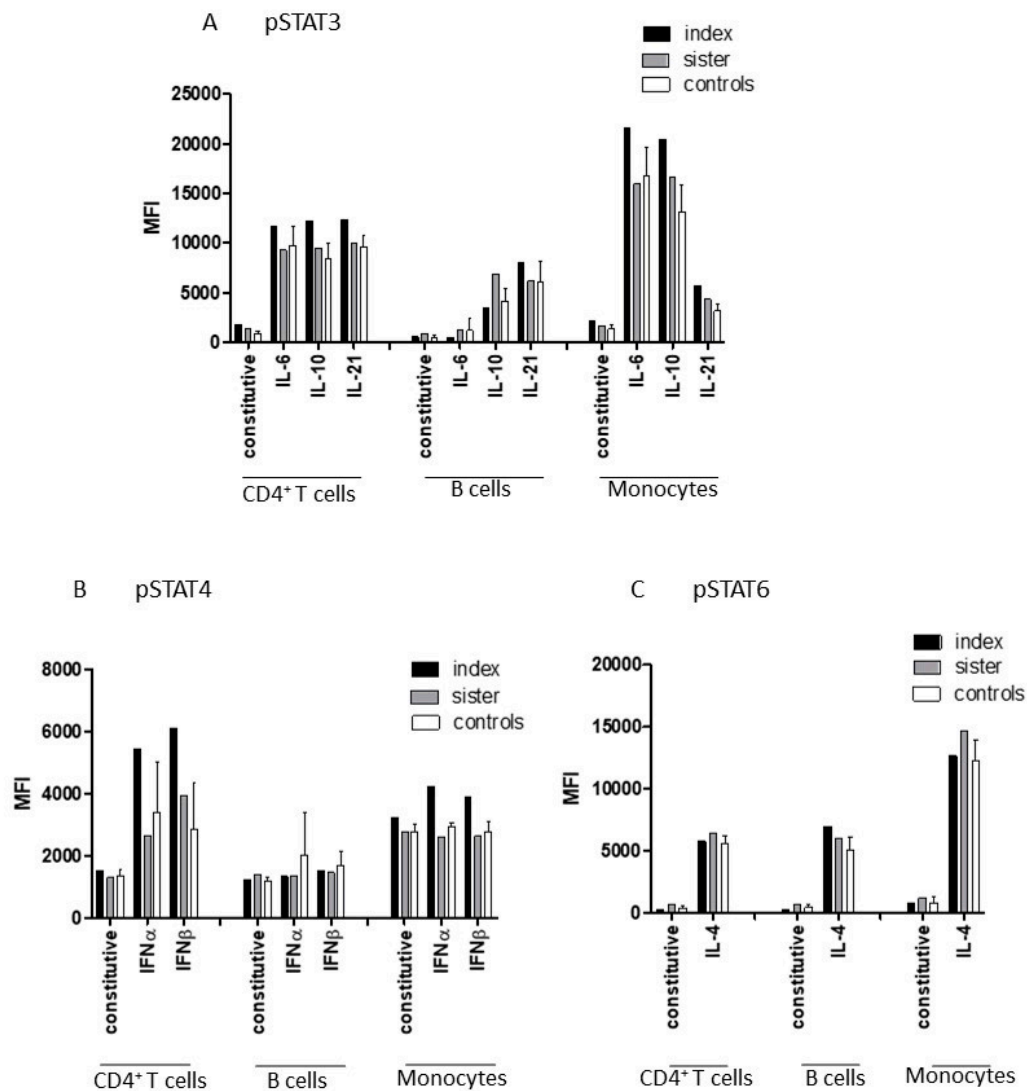

**Supplementary Figure S1:** Constitutive and cytokine-induced phosphorylation of A) STAT3, B) STAT4 and C) STAT6 in CD4<sup>+</sup> T cells, B cells and monocytes. CD; cluster of differentiation, IFN; interferon, IL; interleukin, MFI; median fluorescence intensity, STAT; signal transducer and activator of transcription.
